# Supplementary material for: Palladium(ii) in liquid ammonia: an investigation of structural and dynamical properties by applying quantum mechanical charge field molecular dynamics (QMCF-MD)
Source: Royal Society of Chemistry journal article supplement (doi:10.1039/c7dt01548h), 2017-01-01
Supplement: c7dt01548h1.pdf [file c7dt01548h1.pdf]

**Palladium (II) in Liquid Ammonia : An  
Investigation of Structural and Dynamical Properties  
by applying Quantum Mechanical Charge Field  
Molecular Dynamics (QMCF–MD) –  
Supplementary Material**

*Muhammad Saleh and Thomas S. Hofer\**

Theoretical Chemistry Division  
Institute of General, Inorganic and Theoretical Chemistry  
Center for Chemistry and Biomedicine  
University of Innsbruck, Innrain 80-82, A-6020 Innsbruck, Austria

E-Mail: T.Hofer@uibk.ac.at

Tel.: +43-512-507-57111

Fax: +43-512-507-57199

April 26, 2017

---

\*Corresponding author

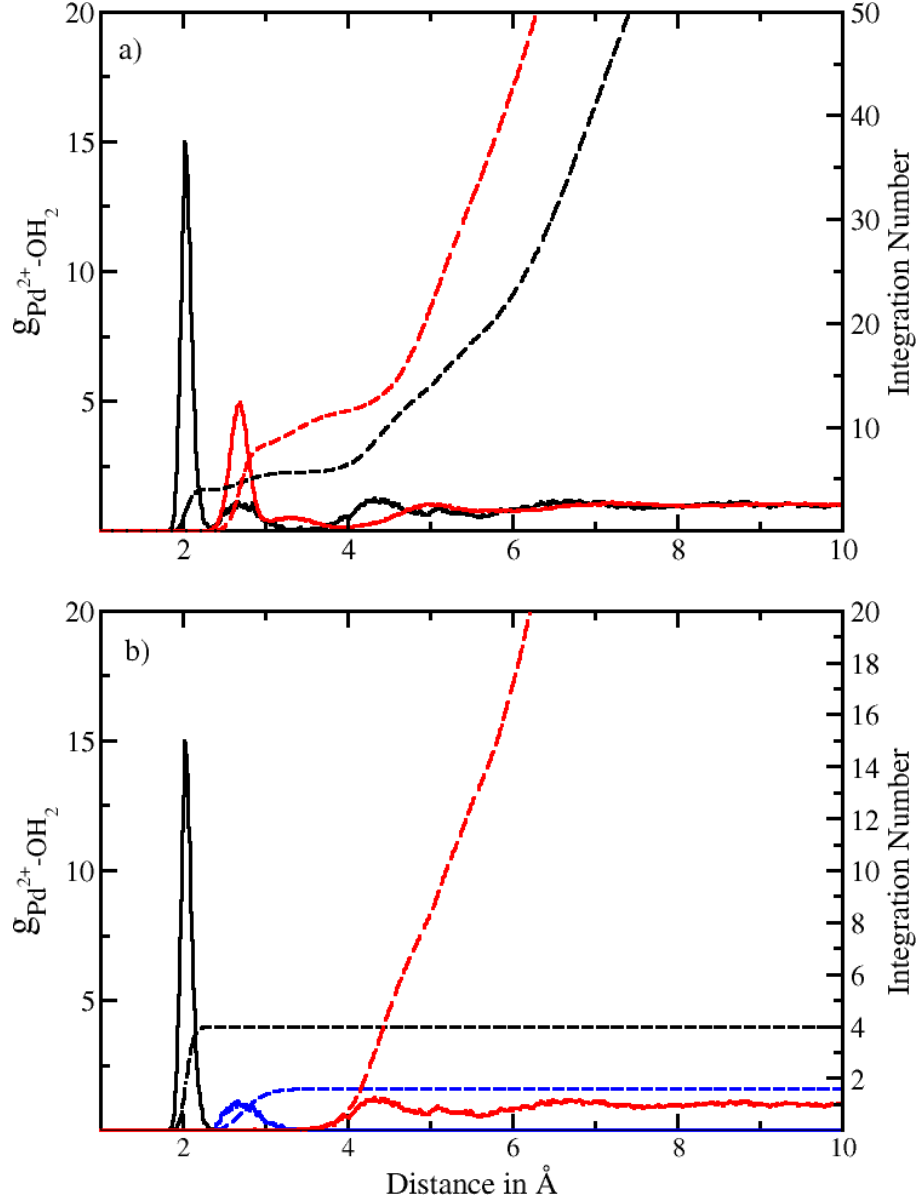

Figure S1: a) Pd<sup>2+</sup>-O (black solid) and Pd<sup>2+</sup>-H (red solid) radial distribution functions (RDFs) and their integration number (dash line) obtained via a previous QMCF-MD simulation.<sup>1</sup> b) Decomposition of the Pd-O RDF according to a combined angular-radial criterion showing the first shell (solid black), extended first shell (solid blue) and second shell plus bulk (red solid) and the associated running integration numbers (dashed).

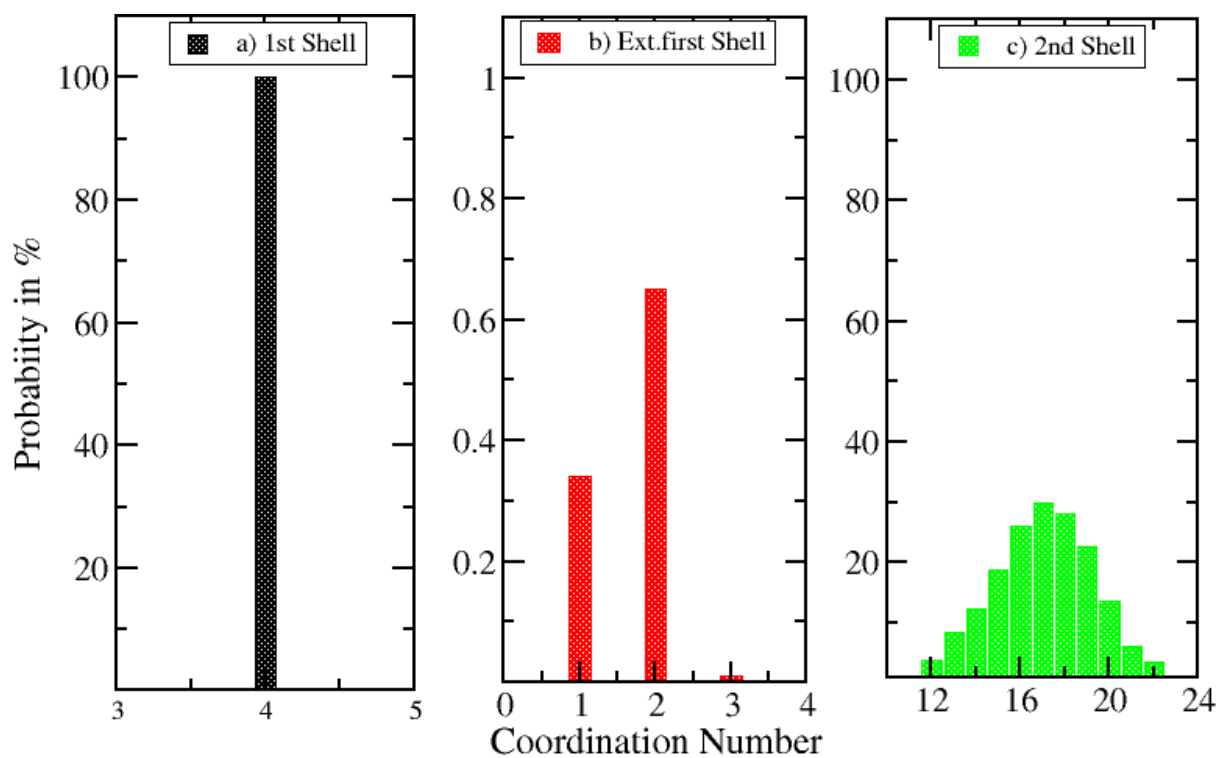

Figure S2: Coordination number distributions (CNDs) of the first, ext. first and second solvation shells of  $\text{Pd}^{2+}$  in aqueous solution obtained from a previous QMCF-MD simulation.<sup>1</sup>

## References

- [1] T. S. Hofer, B. R. Randolph, S. A. A. Shah, B. M. Rode, and I. Persson, *Chem. Phys. Lett.*, 2007, **445**(4), 193–197.
